# Supplementary material for: Adsorptive removal of tetracycline and methylene blue from aqueous solution with a water resistance copper-based metal–organic framework
Source: Royal Society of Chemistry journal article supplement (doi:10.1039/d3nj04212j), 2023-01-01
Supplement: d3nj04212j1.pdf [file d3nj04212j1.pdf]

*Supporting Information:*

**Adsorptive removal of tetracycline and methylene blue from aqueous solution with a water resistance copper-based metal organic framework**

Yingzhi Zhu,<sup>a</sup> Yan Li,<sup>b</sup> Na Ma,<sup>b</sup> and Wei Dai<sup>\*a</sup>

*<sup>a</sup>Key Laboratory of the Ministry of Education for Advanced Catalysis Materials, College of Chemistry and Materials Science, Zhejiang Normal University, Jinhua 321004, People's Republic of China*

*<sup>b</sup>College of Geography and Environmental Sciences, Zhejiang Normal University, Jinhua, 321004, PR China*

**Corresponding author.**

E-mail address: daiwei@zjnu.edu.cn (W. Dai)

**Chemicals:** Copper nitrate trihydrate ( $\text{Cu}(\text{NO}_3)_2 \cdot 3\text{H}_2\text{O}$ , 99 %) (Shanghai Aladdin Biotechnology Co., Ltd.); Tetracycline hydrochloride (98 %) (Beijing Bailingwei Technology Co., Ltd.); deionized water (generated at 25 °C,  $18.25\text{m}\Omega \cdot \text{cm}^{-1}$ ); Benzene-1,3,5-tricarboxylic acid ( $\text{H}_3\text{BTC}$ ), sodium hydroxide (NaOH), hydrochloric acid (HCl), methylene blue (MB), Ethylene glycol ( $(\text{CH}_2\text{OH})_2$ , AR) were purchased from Sinopharm Chemical Reagent Co., Ltd.

**Apparatus:** SEM images are scanned by electron microscope using Hitachi S4800 equipped with EDAX energy dispersion detector (Zeiss Gemini SEM 300). D8 Advance X-ray diffractometer of Bruck AXS GMBH is used to scan the crystal phase

of the material ( $2\theta = 5\sim 40^\circ$ ). The specific surface area and average pore diameter of the material are measured by Autosorb-iQ physical adsorption instrument of Kanta Instrument Co., Ltd. (The samples were degassed at  $120^\circ\text{C}$  for 5h and The  $\text{N}_2$  adsorption-desorption isotherms were recorded at  $-196^\circ\text{C}$ ). The functional groups were analyzed by a Fourier transform infrared spectrometer (FT-IR, Thermo Nicolet NEXUS-670). And the sample absorbance was measured by Shimadzu UV-3600 spectrophotometer at 357 and 664 nm.

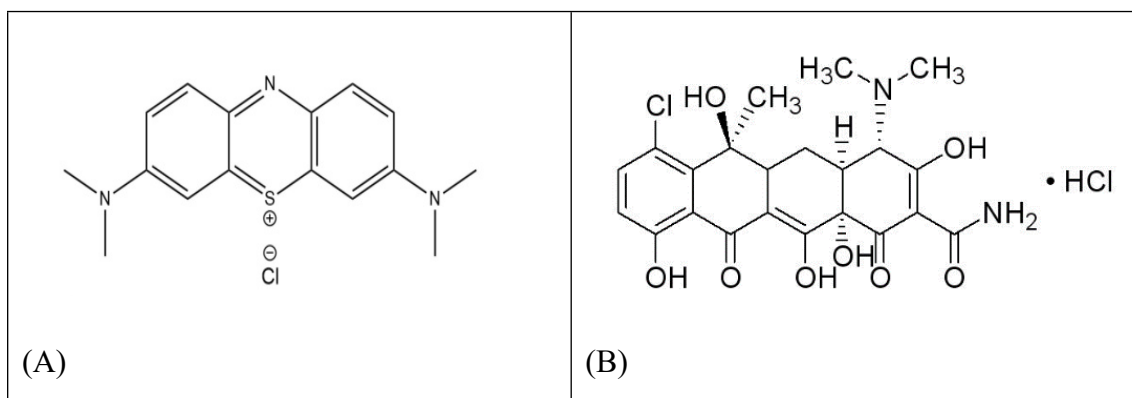

**Scheme S1.** The molecular formula of MB and TC

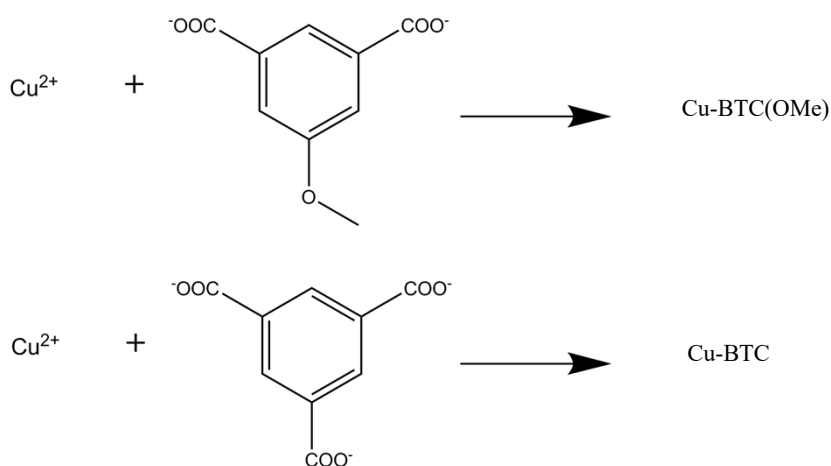

**Scheme S2.** Reaction diagrams of Cu-BTC(OMe), and Cu-BTC using a similar hydrothermal method.

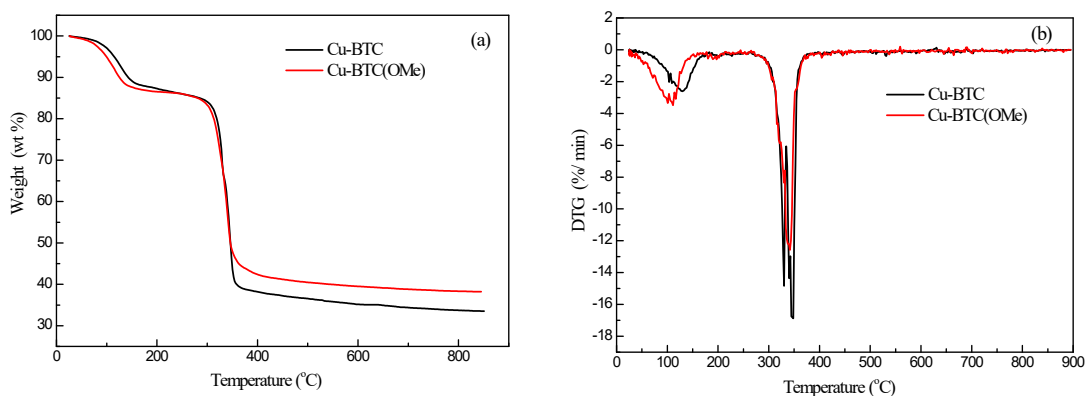

**Fig. S1.** Thermo-gravimetric curves of Cu-BTC and Cu-BTC(OMe): (a) TGA, (b) DTA.

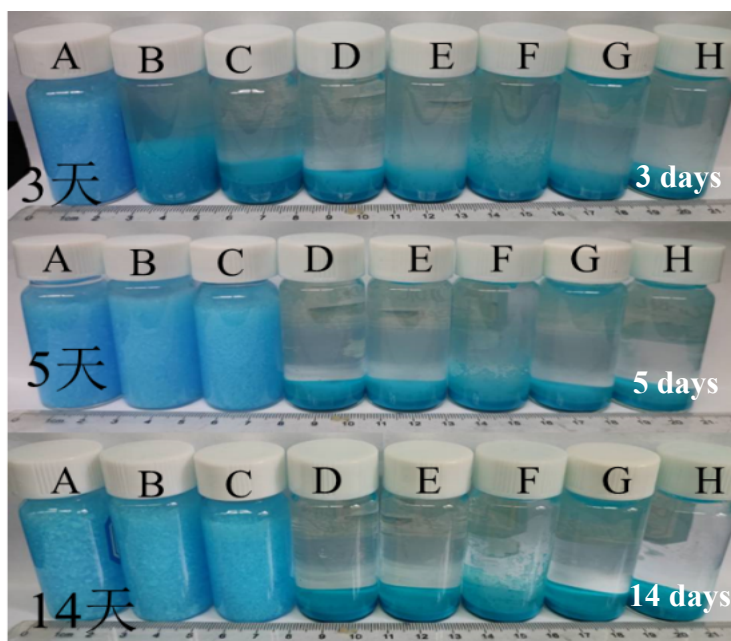

**Fig. S2.** The pictures of (A): Cu-BTC; (B): Cu-BTC(OMe5); (C): Cu-BTC(OMe10); (D): Cu-BTC(OMe15); (E): Cu-BTC(OMe20); (F): Cu-BTC(OMe30); (G): Cu-BTC(OMe40); and (H): Cu-BTC(OMe50) after soaking in water for 3, 5, and 14 days respectively.

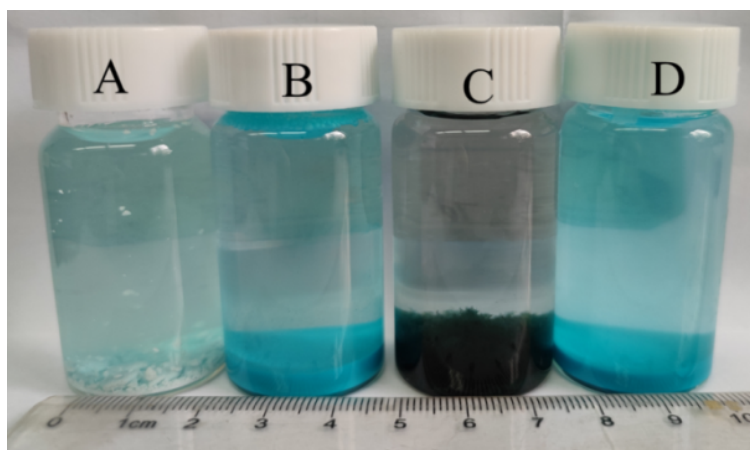

**Fig. S3.** The pictures of the Cu-BTC(OMe50) samples soaked in water at (A): pH=2; (B): pH=7; (C): pH=14 and (D): T=100 °C for 30 min.

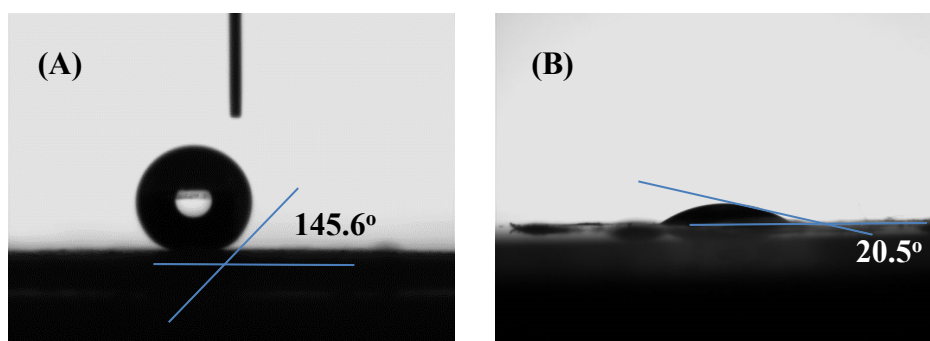

**Fig. S4.** Water contact angles of the (A): Cu-BTC(OMe50) and (B): Cu-BTC.

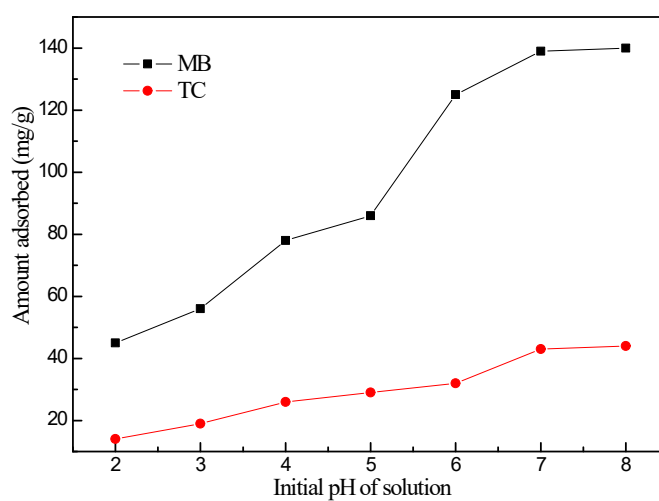

**Fig. S5.** Effect of solution pH on adsorption amounts of the MB and TC over Cu-

BTC(OMe50).

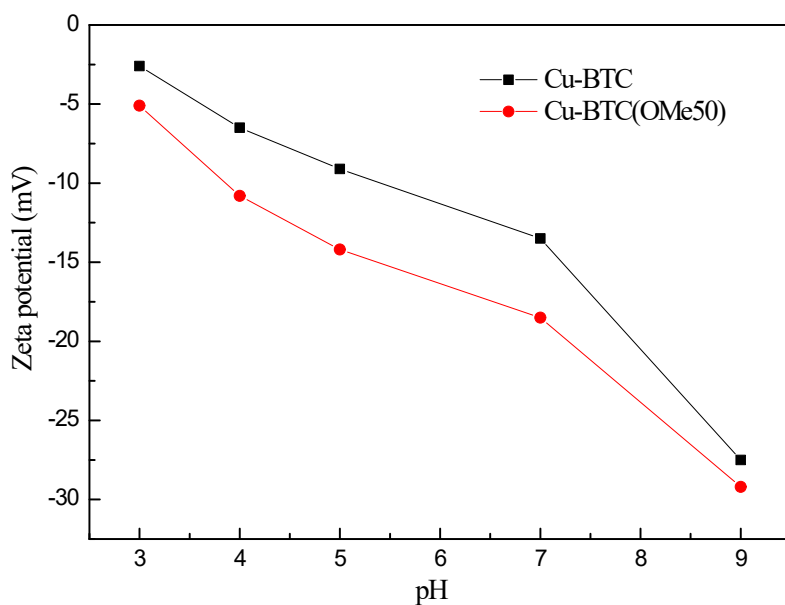

**Fig. S6.** Zeta potential of the Cu-BTC and Cu-BTC(OMe50).

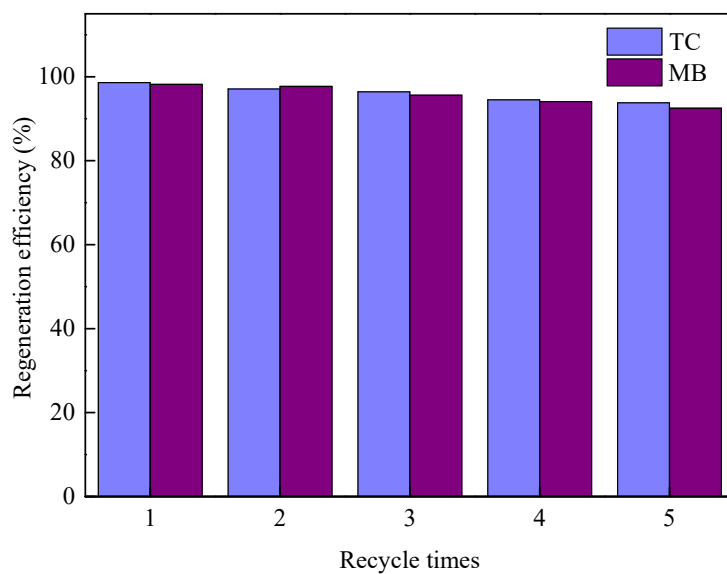

**Fig. S7.** Regenerated performances of Cu-BTC(OMe50) toward MB and TC.

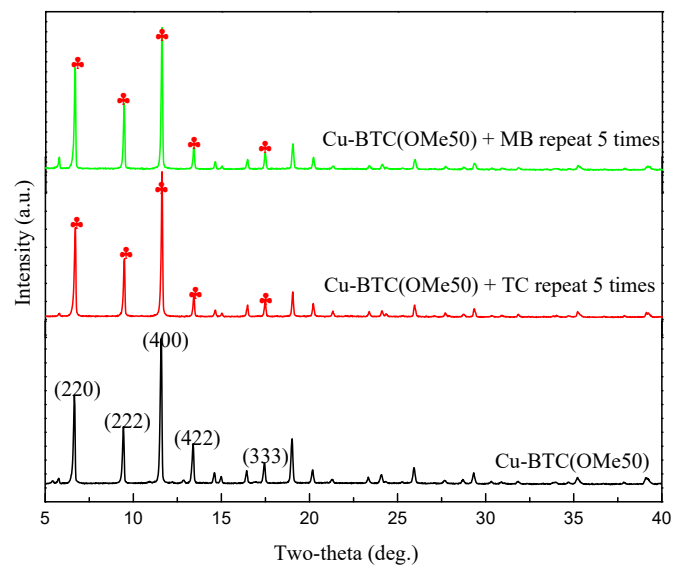

**Fig. S8.** XRD patterns of Cu-BTC(OMe50) repeated adsorption of MB and TC after fifth recycle.

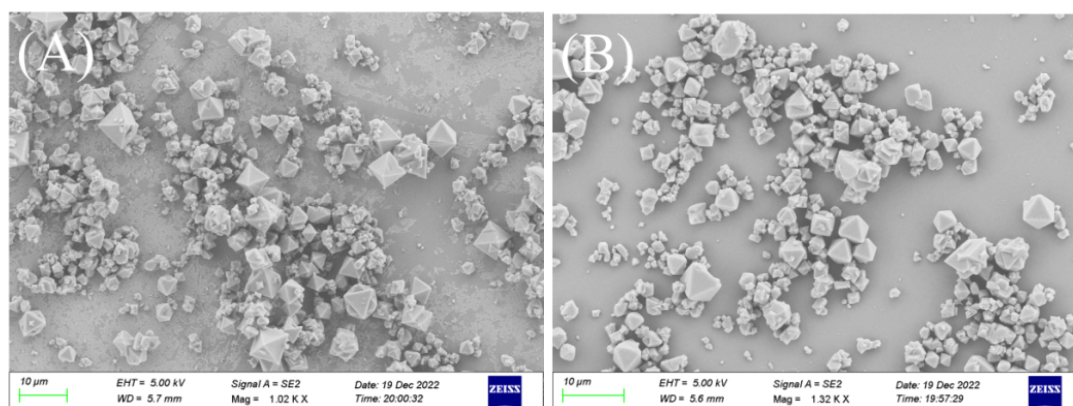

**Fig. S9.** SEM images of Cu-BTC(OMe50) repeated adsorption of MB(A) and TC(B) after fifth recycle.

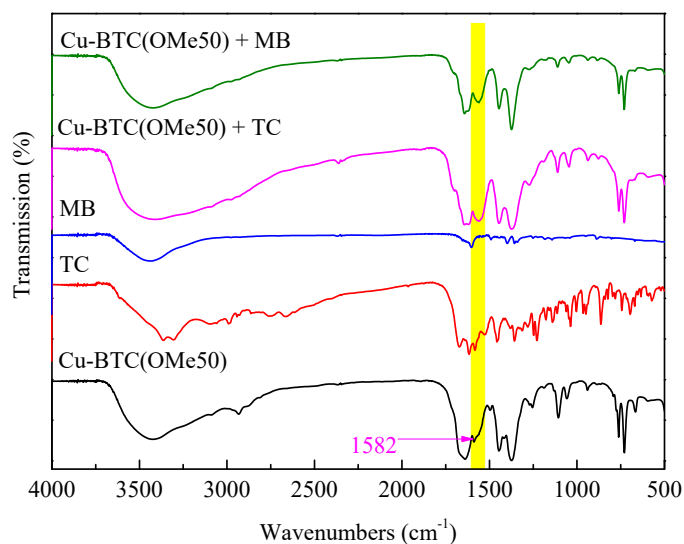

**Fig. S10.** FT-IR curves of Cu-BTC(OMe50) repeated adsorption of MB and TC after fifth recycle.

**Table S1.** Summary of textural properties of the samples

| Samples       | $S_{\text{BET}}$ ( $\text{m}^2 \cdot \text{g}^{-1}$ ) | Pore volume<br>( $\text{cm}^3 \cdot \text{g}^{-1}$ ) | Average pore<br>size<br>(nm) |
|---------------|-------------------------------------------------------|------------------------------------------------------|------------------------------|
| Cu-BTC        | 970                                                   | 0.37                                                 | 0.57                         |
| Cu-BTC(OMe50) | 917                                                   | 0.36                                                 | 0.72                         |
| Cu-OMe        | 68                                                    | 0.08                                                 | 1.90                         |

**Table S2.** Comparison of the MB and TC uptakes over some adsorbents

| Adsorbates | Adsorbents                     | Uptake capacity<br>(mg/g) | References |
|------------|--------------------------------|---------------------------|------------|
| MB         | Cu-BTC(OMe50)                  | 138                       | This work  |
|            | M-Cu-BTC                       | 0.3                       | [1]        |
|            | MIL-53(Al)                     | 4                         | [2]        |
|            | HKUST-1/GO                     | 14                        | [3]        |
|            | $\text{Fe}_3\text{O}_4$ @ZIF-8 | 20                        | [4]        |
|            | Co/Fe-BDC                      | 24                        | [5]        |
|            | JS-AC                          | 60                        | [6]        |
|            | PEC/CS                         | 170                       | [7]        |
|            | Pine leaves                    | 123                       | [8]        |

| Adsorbates | Adsorbents                                           | Uptake capacity (mg/g) | References |
|------------|------------------------------------------------------|------------------------|------------|
|            | Ce-UiO-66                                            | 49                     | [9]        |
|            | MWCNTs                                               | 44                     | [10]       |
|            | $\gamma$ -Fe <sub>2</sub> O <sub>3</sub> @P-graphene | 125                    | [11]       |
|            | MMDM                                                 | 7                      | [12]       |
| TC         | Cu-BTC(OMe50)                                        | 42                     | This work  |
|            | UiO-66(NH <sub>2</sub> )                             | 59                     | [13]       |
|            | NiCoFe-MOF-74                                        | 103                    | [14]       |
|            | In <sub>2</sub> S <sub>3</sub> /UiO-66               | 106                    | [15]       |
|            | MnUiO-66                                             | 72                     | [16]       |
|            | MSCG                                                 | 32                     | [17]       |
|            | MGO                                                  | 106                    | [18]       |
|            | Graphene oxide/Calcium alginate                      | 132                    | [19]       |
|            | IMt-2                                                | 32                     | [20]       |
|            | HM                                                   | 4.6                    | [21]       |
|            | HM-Fe                                                | 5.3                    | [21]       |
|            | MARG                                                 | 24.2                   | [22]       |

### References:

- [1] A. R. Abbasi, M. Karimi, K. Daasbjerg, *Ultrason. Sonochem.*, 2017, **37**, 182-191.
- [2] C. Li, Z. H. Xiong, J. M. Zhang, C. Wu, *J. Chem. Eng. Data*, 2015, **60**, 3414-3422.
- [3] L. Li, X. L. Liu, H. Y. Geng, B. Hu, G.W. Song, Z.S. Xu, *J. Mater. Chem. A.*, 2013, **1**, 10292.
- [4] J. Zheng, C. Cheng, W.J. Fang, C. Chen, R.W. Yan, H.X. Huai, C.C. Wang, *Cryst. Eng. Comm.*, 2014, **16**, 3960-3964.
- [5] S. Soni, P. K. Bajpai, J. Mittal, *J. Mol. Liq.*, 2020, **314**, 113642.
- [6] R. Dod, G. Banerjee, D. R. Saini, *Clean Technol. Envir.*, 2015, **17**, 2349-2359.
- [7] O. A. Attallah, W. Mamdouh, *Int. J. Environ. Sci. Te.*, 2021, **18**, 131-140.



- [8] M. T. Yagub, T. K. Sen, H. M. Ang, *Water Air Soil Poll.*, 2012, **223**, 5267-5282.
- [9] M. R. Richelle, S. Ganesan, V. A. Kanalli, *J. Hazard. Mat.*, 2021, **416**, 125941.
- [10] D. L. Zhao, Y. Ding, S. H. Chen, *Asian J. Chem.*, 2013, **25**, 5756-5758.
- [11] L. Y. Zhang, W. L. Zhang, Z. Q. Zhou, *J. Colloid Interf. Sci.*, 2016, **476**, 200-205.
- [12] H. John, G. Heba, M. Nour, *Sci. Total Environ.*, 2020, **714**, 136832-136842.
- [13] Y. Pan, X. Z. Yuan, L. B. Jiang, *Chem. Eng. J.*, 2020, **384**, 123310-123325.
- [14] R. Xiao, H. I. Abdu, L. Wei, *Analyst*, 2020, **145**, 2398-2404.
- [15] W. B. Dong, D. B. Wang, H. Wang, *J. Colloid Interf. Sci.*, 2019, **535**, 444-457.
- [16] Z. H. Yang, J. Cao, Y. P. Chen, *Micropor. Mesopor. Mat.*, 2019, **277**, 277-285.
- [17] B. Y. Huang, Y. G. Liu, B. Li, *Carbohydr. Polym.*, 2017, **157**, 576-585.
- [18] J. H. Miao, F. H. Wang, Y. J. Chen, *Appl. Surf. Sci.*, 2019, **475**, 549-558.
- [19] H. T. Zhu, T. Chen, J. Q. Liu, *RSC Adv.*, 2018, **8**, 2616-2621.
- [20] P. H. Chang, Z. H. Li, J. S. Jean, W. T. Jiang, C. J. Wang, K. H. Lin, *Appl. Clay Sci.*, 2012, **67**, 158-163.
- [21] H. B. Hou, G. L. Xu, F. He, H. Pan, *Int. J. Environ. Res.* 2023, **20**, 2901.
- [22] D. Huang, J. Wu, L. Wang, X. Liu, J. Meng, X. Tang, *Chem. Eng. J.*, 2019, **358**, 1399-1409.

**Table S3.** Summary of fitting parameters of the adsorption isotherm model of MB by Cu-BTC and others.

| Samples       | Langmuir model                            |                 |        | Freundlich model                    |        |        |
|---------------|-------------------------------------------|-----------------|--------|-------------------------------------|--------|--------|
|               | $C_e/q_e=(1/q_{max})*C_e+1/(K_L*q_{max})$ |                 |        | $\ln q_e = \ln K_f + (1/n)*\ln C_e$ |        |        |
|               | $q_L$<br>(mg/g)                           | $K_L$<br>(L/mg) | $R^2$  | $K_f$<br>(L/g)                      | $n$    | $R^2$  |
| Cu-BTC        | 20.04                                     | 0.0757          | 0.9498 | 3.2677                              | 2.4931 | 0.6764 |
| Cu-BTC(OMe50) | 188.68                                    | 0.0941          | 0.9551 | 21.3681                             | 1.7050 | 0.9005 |
| Cu-OMe        | 61.35                                     | 0.0540          | 0.9249 | 6.9448                              | 2.0691 | 0.7440 |

**Table S4.** Summary of fitting parameters of the adsorption isotherm model of TC by Cu-BTC and others.

| Samples       | Langmuir model                            |                 |        | Freundlich model                    |        |        |
|---------------|-------------------------------------------|-----------------|--------|-------------------------------------|--------|--------|
|               | $C_e/q_e=(1/q_{max})*C_e+1/(K_L*q_{max})$ |                 |        | $\ln q_e = \ln K_f + (1/n)*\ln C_e$ |        |        |
|               | $q_m$<br>(mg/g)                           | $K_L$<br>(L/mg) | $R^2$  | $K_f$<br>(L/g)                      | $n$    | $R^2$  |
| Cu-BTC        | 32.26                                     | 0.0388          | 0.9472 | 2.9571                              | 1.9999 | 0.8557 |
| Cu-BTC(OMe50) | 81.97                                     | 0.0172          | 0.9188 | 2.8095                              | 1.4999 | 0.9263 |
| Cu-OMe        | 81.97                                     | 0.0089          | 0.9101 | 1.2002                              | 1.2933 | 0.9870 |

**Table S5.** Kinetics parameters on the adsorption of MB in solution by Cu-BTC and others.

| Samples       | Pseudo-first-order kinetic model          |                       |                  |        |                      |                   | Pseudo-second-order kinetic model |                     |        |                      |                   |
|---------------|-------------------------------------------|-----------------------|------------------|--------|----------------------|-------------------|-----------------------------------|---------------------|--------|----------------------|-------------------|
|               | $\ln(q_e - q_t) = \ln(q_{e,cal}) - k_1 t$ |                       |                  |        |                      |                   | $t/q_t = 1/(K_2 * q_e^2) + t/q_e$ |                     |        |                      |                   |
|               | $q_{e,exp}$<br>(mg/g)                     | $q_{e,cal}$<br>(mg/g) | $K_1$<br>(1/min) | $R^2$  | $\Delta q$<br>(mg/g) | $\Delta q$<br>(%) | $q_{e,cal}$<br>(mg/g)             | $K_2$<br>(g/mg·min) | $R^2$  | $\Delta q$<br>(mg/g) | $\Delta q$<br>(%) |
| Cu-BTC        | 13.32                                     | 7.95                  | 0.0104           | 0.9318 | 5.37                 | 40.32             | 14.56                             | 0.0019              | 0.9984 | 1.24                 | 9.31              |
| Cu-BTC(OMe50) | 139.33                                    | 226.56                | 0.0123           | 0.9282 | 87.23                | 62.61             | 217.39                            | 0.0000              | 0.9914 | 78.06                | 56.03             |
| Cu-OMe        | 49.60                                     | 74.20                 | 0.0124           | 0.9245 | 24.60                | 49.60             | 70.42                             | 0.0000              | 0.9927 | 20.82                | 41.98             |

**Table S6.** Kinetics parameters on the adsorption of TC in solution by Cu-BTC and others.

| Samples       | Pseudo-first-order kinetic model          |                       |                  |        |                      |                   | Pseudo-second-order kinetic model |                     |        |                      |                   |
|---------------|-------------------------------------------|-----------------------|------------------|--------|----------------------|-------------------|-----------------------------------|---------------------|--------|----------------------|-------------------|
|               | $\ln(q_e - q_t) = \ln(q_{e,cal}) - k_1 t$ |                       |                  |        |                      |                   | $t/q_t = 1/(K_2 * q_e^2) + t/q_e$ |                     |        |                      |                   |
|               | $q_{e,exp}$<br>(mg/g)                     | $q_{e,cal}$<br>(mg/g) | $K_1$<br>(1/min) | $R^2$  | $\Delta q$<br>(mg/g) | $\Delta q$<br>(%) | $q_{e,cal}$<br>(mg/g)             | $K_2$<br>(g/mg·min) | $R^2$  | $\Delta q$<br>(mg/g) | $\Delta q$<br>(%) |
| Cu-BTC        | 25.81                                     | 19.00                 | 0.0290           | 0.9539 | 6.81                 | 26.39             | 29.59                             | 0.0016              | 0.9944 | 3.78                 | 14.64             |
| Cu-BTC(OMe50) | 44.25                                     | 17.26                 | 0.0198           | 0.9786 | 26.99                | 60.99             | 45.25                             | 0.0031              | 0.9984 | 1.00                 | 2.26              |
| Cu-OMe        | 35.73                                     | 31.56                 | 0.0374           | 0.9532 | 4.17                 | 11.67             | 40.49                             | 0.0014              | 0.9973 | 4.76                 | 13.32             |
